# Supplementary material
Source: PubMed Central journal article supplement (PMC4765494)
Supplement: NIHMS759959-supplement-Supporting_Information.pdf [file NIHMS759959-supplement-Supporting_Information.pdf]

## Supporting Information

# **$^{15}\text{N}$ and $^1\text{H}$ Solid-State NMR Investigation of a Canonical Low-Barrier Hydrogen-Bond Compound: 1,8-bis(dimethylamino) naphthalene**

Paul B. White and Mei Hong\*

Department of Chemistry, Massachusetts Institute of Technology, 170 Albany Street,  
Cambridge, MA 02139

Full author list for reference 35:

35. Acharya, A.; Carnevale, V.; Fiorin, G.; Levine, B. G.; Polishchuk, A.; Balannick, V.; Samish, I.; Lamb, R. A.; Pinto, L. H.; DeGrado, W. F.; Klein, M. L., Structural Mechanism of Proton Transport Through the Influenza A M2 Protein. *Proc. Natl. Acad. Sci. U. S. A.* **2010**, *107*, 15075-15080.
